# Supplementary material
Source: Springer Nature journal article supplement (https://www.springermedizin.de/resource/supplementary/12916_2008_188_MOESM6_ESM.pdf/9599372)

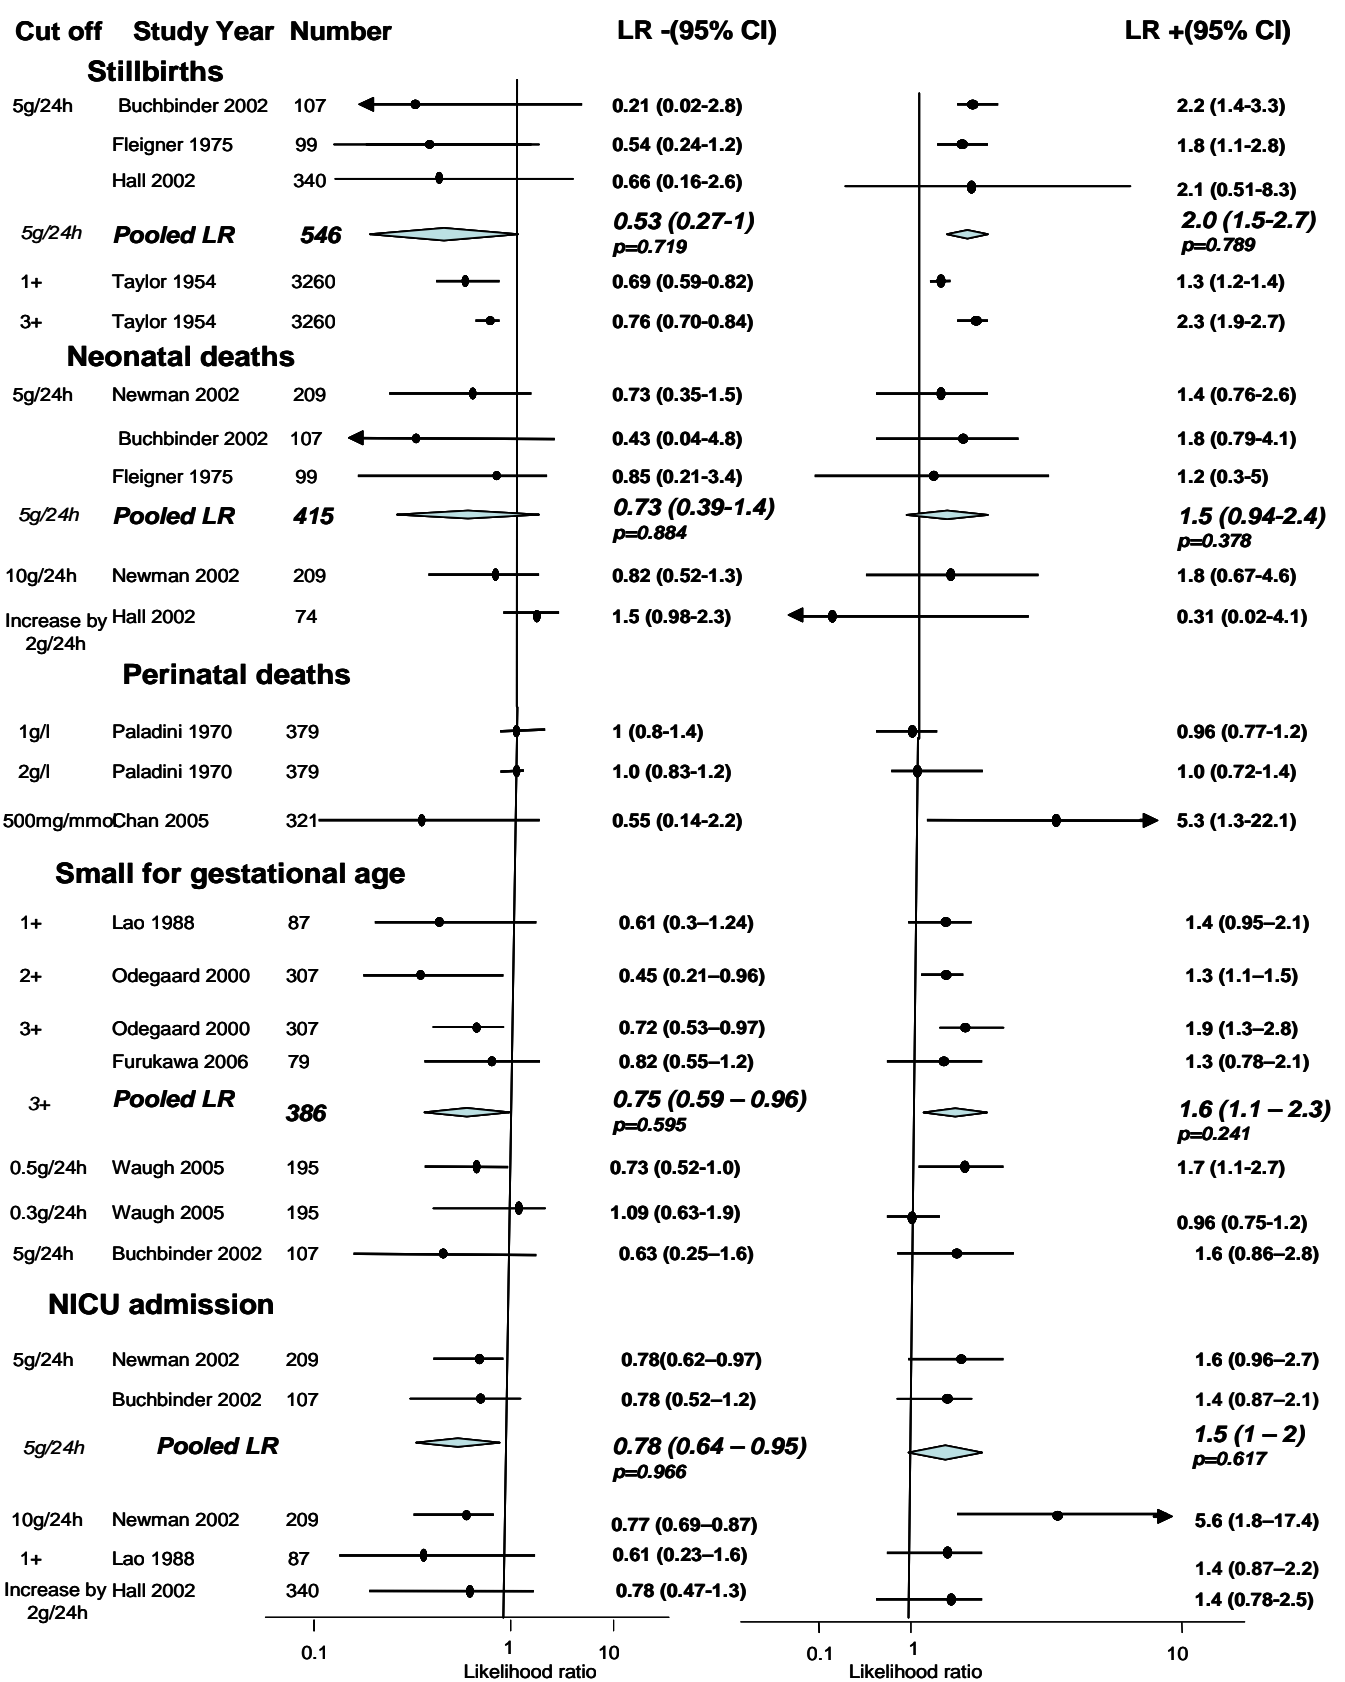

Supplement: MOESM6 [file 9599372]
